# Supplementary material
Source: PubMed Central journal article supplement (PMC4961615)
Supplement: NIHMS788506-supplement-supp_tables.pdf [file NIHMS788506-supplement-supp_tables.pdf]

Supplemental Tables

**Supplementary Table 1. Regional profile of individual neurons that are selective for specific task features and theta modulated during context exploration or object sampling**

| Region | Context Exploration |                    | Object Sampling   |                    |
|--------|---------------------|--------------------|-------------------|--------------------|
|        | Context<br>n/N (%)  | Context<br>n/N (%) | Object<br>n/N (%) | Valence<br>n/N (%) |
| dHPC   | 78/98 (80)          | 43/58 (74)         | 42/57 (74)        | 35/56 (63)         |
| vHPC   | 32/38 (84)          | 14/19 (74)         | 7/13 (54)         | 7/11 (64)          |
| mPFC   | 46/89 (52)          | 26/68 (38)         | 31/71 (44)        | 35/98 (36)         |

For each brain region, n = number of cells selective for a specific feature that are theta-modulated, N = total number of cells that are selective for that feature, and % = percentage of feature selective cells that are theta modulated.

**Supplementary Table 2 | PFC-HPC lag/lead of maximal correlation during accurate performance by individual subjects**

| Subject | Context exploration<br>(ms) | Object sampling<br>(ms) |
|---------|-----------------------------|-------------------------|
| 1 - VH  | -36                         | 24                      |
| 1 - DH  | -41                         | 59                      |
| 2 - VH  | -8                          | 38                      |
| 2 - DH  | -23                         | 39                      |
| 3 - VH  | -11                         | 19                      |
| 3 - DH  | -28                         | 23                      |
| 4 - DH  | -40                         | 43                      |
| 5 - DH  | -24                         | 33                      |
| 6 - DH  | -33                         | 28                      |
| 7 - VH  | -33                         | 36                      |

Negative values indicate HPC leads; vs. positive values indicate PFC leads.

**Supplementary Table 3 | PFC-HPC lag/lead of maximal correlation during correct trials and errors during learning in individual subjects**

| Subject | Correct trials           |                      | Errors                   |                      |
|---------|--------------------------|----------------------|--------------------------|----------------------|
|         | Context exploration (ms) | Object sampling (ms) | Context exploration (ms) | Object sampling (ms) |
| 1       | -60                      | 29                   | -2                       | 37                   |
| 2       | -2                       | 30                   | -51                      | 18                   |
| 3       | -12                      | 32                   | 0                        | 71                   |
| 4       | -93                      | 32                   | 49                       | 100                  |
| 5       | -33                      | 20                   | 0                        | 70                   |
| 6       | -16                      | 26                   | -15                      | 49                   |
| 7       | -6                       | 37                   | -16                      | -1                   |

Negative values indicate HPC leads; vs. positive values indicate PFC leads.
